# Supplementary material
Source: HighWire-hosted journal article supplement (https://erj.ersjournals.com/content/58/5/2100705)
Supplement: inline-supplementary-material-1 [file inline-supplementary-material-1.pdf]

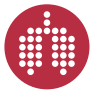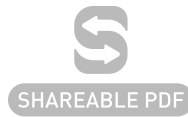

# Long-term exposures to air pollutants affect $F_{eNO}$ in children: a longitudinal study

Yue Zhang <sup>1,2,3</sup>, Sandrah P. Eckel<sup>4</sup>, Kiros Berhane<sup>5</sup>, Erika Garcia <sup>4</sup>, Patrick Muchmore<sup>6</sup>,  
Noa Ben-Ari Molshatzki<sup>4</sup>, Edward B. Rappaport<sup>4</sup>, William S. Linn<sup>4</sup>, Rima Habre<sup>4</sup> and Frank D. Gilliland<sup>4</sup>

<sup>1</sup>Dept of Internal Medicine, University of Utah, Salt Lake City, UT, USA. <sup>2</sup>Dept of Family and Preventive Medicine, University of Utah, Salt Lake City, UT, USA. <sup>3</sup>Veteran Affairs Salt Lake City Health Care System, Salt Lake City, UT, USA. <sup>4</sup>Dept of Preventive Medicine, University of Southern California, Los Angeles, CA, USA. <sup>5</sup>Dept of Biostatistics, Columbia University, New York, NY, USA. <sup>6</sup>CodoniX, Inc., Potomac, MD, USA.

Corresponding author: Yue Zhang ([zhang.yue@hsc.utah.edu](mailto:zhang.yue@hsc.utah.edu))

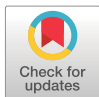

Shareable abstract (@ERSpublications)

Annual average  $PM_{2.5}$  and  $NO_2$  were associated with airway inflammation as measured by  $F_{eNO}$  in schoolchildren, adding new evidence that long-term exposure affects  $F_{eNO}$  beyond the well-documented short-term effects <https://bit.ly/3CGfYXN>

**Cite this article as:** Zhang Y, Eckel SP, Berhane K, *et al.* Long-term exposures to air pollutants affect  $F_{eNO}$  in children: a longitudinal study. *Eur Respir J* 2021; 58: 2100705 [DOI: 10.1183/13993003.00705-2021].

This single-page version can be shared freely online.

Copyright ©The authors 2021. For reproduction rights and permissions contact [permissions@ersnet.org](mailto:permissions@ersnet.org)

Received: 4 Jan 2021  
Accepted: 5 Aug 2021

*To the Editors:*

Fractional exhaled nitric oxide ( $F_{eNO}$ ) is a marker of airway inflammation shown to be responsive to short-term air pollution exposures [1–4]. Although a number of cross-sectional studies have related  $F_{eNO}$  to either location-based proxies for long-term exposures to traffic/industrial activity or long-term (seasonal to annual average) ambient pollution [5–9], there is lack of longitudinal study and the effects of longer-term air pollution exposures on  $F_{eNO}$  are still not well studied, especially for school children. To fill the knowledge gap, we conducted a new study on longitudinal assessments of  $F_{eNO}$  to air pollutant exposures in the Southern California Children’s Health Study (CHS) to determine whether  $F_{eNO}$  is a marker for chronic effects of air pollution exposures after accounting for short-term exposures.
